# Supplementary material for: Microbial Metagenomes and Host Transcriptomes Reveal the Dynamic Changes of Rumen Gene Expression, Microbial Colonization and Co-Regulation of Mineral Element Metabolism in Yaks from Birth to Adulthood
Source: MDPI journal article supplement (doi:10.3390/ani14091365), 2024-04-30
Supplement: s1 [file s1]

**Table S1.** Forward and reverse primers used for gene quantification by RT-qPCR

| Gene          | GenBank        | Primer sequence(5'-3')                                 | Amplicon Size (bp) |
|---------------|----------------|--------------------------------------------------------|--------------------|
| <i>BDHI</i>   | XM_005897835.2 | F: C TTCAGTGGACCCGGTTCG<br>R: CCAGCAAACACAAGGAAGCC     | 112                |
| <i>ECHS1</i>  | XM_005891447.2 | F: AACTTTTGCCACCGAAGACC<br>R: GCTTTTGAAGCTGCTCGTCC     | 135                |
| <i>FDPS</i>   | XM_005898693.2 | F: TACTAGATCCAGCGACCCGA<br>R: AGGGAGTAAAATGCTCTGTTTCCT | 105                |
| <i>HMGCS2</i> | XM_005895274.2 | F: GCAACACTGACATTGAGGGC<br>R: ACCAGTGCATAGCGACCATC     | 118                |
| <i>PCCA</i>   | XM_005899255.2 | F: ACCATGAAAGTTCAAGAGTGCC<br>R: TGTAGCAGCTTCTGTGGTTCA  | 142                |
